# Supplementary material for: Influence of Brewing Method on the Content of Selected Elements in Yerba Mate (Ilex paraguarensis) Infusions
Source: MDPI journal article supplement (doi:10.3390/foods12051072), 2023-03-02
Supplement: s1 [file s1]

## **Supplementary Material**

### **Influence of extraction parameters on the content of selected elements in yerba mate (*Ilex paraguarensis*) infusions**

**Jędrzej Proch, Anna Różewska, Aleksandra Orłowska, Przemysław Niedzielski\***

Department of Analytical Chemistry, Faculty of Chemistry, Adam Mickiewicz University,  
Uniwersytetu Poznańskiego 8, 61–614 Poznań, Poland.

**\*Corresponding author**

**mail:** pnied@amu.edu.pl

**phone:** +48 61 829 1574

**Table S1.** The list of elements in fresh tap water (mg L<sup>-1</sup>) and blank samples (BEC, blank equivalent concentration, mg kg<sup>-1</sup>) of each procedure (A–D), which were determined above instrument quantification limits (IQLs) and method quantification limits (MQLs) respectively.

| Element | IQL<br>(mg L <sup>-1</sup> ) | Fresh tap water<br>(mg L <sup>-1</sup> ) | MQL<br>(mg kg <sup>-1</sup> ) | BEC (mg kg <sup>-1</sup> ) |                  |                     |                    |
|---------|------------------------------|------------------------------------------|-------------------------------|----------------------------|------------------|---------------------|--------------------|
|         |                              |                                          |                               | A (tap water, RT)          | B (DI water, RT) | C (tap water, 80°C) | D (DI water, 80°C) |
| Al      | 0.018                        | 0.036                                    | 0.28                          | 4.78                       | 2.57             | 2.17                | 1.56               |
| Ca      | 0.073                        | 178                                      | 1.1                           | 2870                       | 31.6             | 2970                | 9.3                |
| Cu      | 0.0019                       | 0.0060                                   | 0.028                         | 0.219                      | 0.054            | 0.156               | 0.044              |
| Fe      | 0.017                        | 0.030                                    | 0.25                          | 5.06                       | 3.08             | 1.77                | 1.74               |
| K       | 0.113                        | 20.5                                     | 1.7                           | 374                        | 270              | 349                 | 274                |
| Mg      | 0.053                        | 8.71                                     | 0.79                          | 166                        | 6.09             | 166                 | 2.77               |
| Mn      | 0.0080                       | <IQL                                     | 0.12                          | 5.07                       | 2.83             | 1.63                | 1.70               |
| Na      | 0.087                        | 29.3                                     | 1.3                           | 548                        | 36.8             | 526                 | 14.5               |
| Ni      | 0.0044                       | <IQL                                     | 0.066                         | 0.197                      | 0.347            | 0.120               | 0.084              |
| P       | 0.035                        | <IQL                                     | 0.52                          | 5.11                       | 3.42             | 1.66                | 1.87               |
| S       | 0.12                         | 34.9                                     | 1.8                           | 1380                       | 21.2             | 1660                | 14.4               |
| Sr      | 0.0027                       | 0.328                                    | 0.040                         | 5.51                       | 0.078            | 5.59                | <MQL               |
| Zn      | 0.0051                       | <IQL                                     | 0.076                         | 0.222                      | 0.257            | 0.125               | <MQL               |

IQL – instrument limit quantification (10  $\sigma$  criterium); MQL – method limit quantification (including ultrasound–assisted extraction); BEC – blank equivalent concentration;  
RT – room temperature; DI – deionized (water);

**Table S2.** Performance parameters obtained with ICP OES for determination of selected elements in yerba mate.

| Element | Emission line<br>(nm) | Calibration range<br>(mg kg <sup>-1</sup> ) | MQL(total)<br>(mg kg <sup>-1</sup> ) | MQL(ext)<br>(mg kg <sup>-1</sup> ) |
|---------|-----------------------|---------------------------------------------|--------------------------------------|------------------------------------|
| Al      | 396.152               | MQL–50000                                   | 0.92                                 | 0.28                               |
| As      | 188.980               | MQL–500                                     | 0.10                                 | 0.029                              |
| Ca      | 422.673               | MQL–100000                                  | 3.8                                  | 1.1                                |
| Cd      | 214.439               | MQL–1000                                    | 0.027                                | 0.0081                             |
| Co      | 238.892               | MQL–1000                                    | 0.12                                 | 0.037                              |
| Cr      | 267.716               | MQL–1000                                    | 0.13                                 | 0.040                              |
| Cu      | 327.395               | MQL–1000                                    | 0.093                                | 0.028                              |
| Fe      | 238.204               | MQL–12500                                   | 0.85                                 | 0.25                               |
| Hg      | 194.164               | MQL–500                                     | 0.51                                 | 0.15                               |
| K       | 769.897               | MQL–100000                                  | 5.8                                  | 1.7                                |
| Mg      | 285.213               | MQL–100000                                  | 2.6                                  | 0.79                               |
| Mn      | 257.610               | MQL–12500                                   | 0.41                                 | 0.12                               |
| Mo      | 202.032               | MQL–500                                     | 0.12                                 | 0.037                              |
| Na      | 588.995               | MQL–50000                                   | 4.2                                  | 1.3                                |
| Ni      | 231.604               | MQL–1000                                    | 0.22                                 | 0.066                              |
| P       | 213.618               | MQL–25000                                   | 1.7                                  | 0.52                               |
| Pb      | 220.353               | MQL–1000                                    | 0.28                                 | 0.083                              |
| Rb      | 780.026               | MQL–1000                                    | 0.57                                 | 0.17                               |
| S       | 181.972               | MQL–25000                                   | 6.1                                  | 1.8                                |
| Se      | 196.026               | MQL–500                                     | 0.62                                 | 0.19                               |
| Sr      | 460.733               | MQL–1000                                    | 0.13                                 | 0.040                              |
| V       | 292.401               | MQL–500                                     | 0.18                                 | 0.053                              |
| Zn      | 213.857               | MQL–1000                                    | 0.25                                 | 0.076                              |

MQL(total) – method quantification limit (microwave–assisted mineralization); MQL(ext) – method quantification limit (ultrasound–assisted extraction).

**Table S3.** The ICP OES analysis of certified reference materials (CRMs): hardwood biomass material (SRM 2790), tobacco leaves (OBTL–5, PVTL–6), mushroom powders (IPE–120, CS–M–3), prepared using the procedure of microwave–assisted acid mineralization. All results presented as mean±SD (n=3), except where is noted.

| Element | Inorganic Constituents in Hardwood Biomass Material (SRM® 2790, NIST, USA) |                                    |                 | Oriental Basma Tobacco Leaves (OBTL–6, INCT, Poland) |                                    |                 | Polish Virginia Tobacco Leaves (PVTL–6, INCT, Poland) |                                    |                 | Mushroom ( <i>Agaricus bisporus</i> ) (IPE–120, WEPAL, Netherlands) |                                    |                 | Microelements in Mushroom Powder (CS–M–3, INCT, Poland) |                                    |                 |
|---------|----------------------------------------------------------------------------|------------------------------------|-----------------|------------------------------------------------------|------------------------------------|-----------------|-------------------------------------------------------|------------------------------------|-----------------|---------------------------------------------------------------------|------------------------------------|-----------------|---------------------------------------------------------|------------------------------------|-----------------|
|         | Certified (±U)<br>(mg kg <sup>-1</sup> )                                   | Detected<br>(mg kg <sup>-1</sup> ) | Recovery<br>(%) | Certified (±U)<br>(mg kg <sup>-1</sup> )             | Detected<br>(mg kg <sup>-1</sup> ) | Recovery<br>(%) | Certified (±U)<br>(mg kg <sup>-1</sup> )              | Detected<br>(mg kg <sup>-1</sup> ) | Recovery<br>(%) | Certified (±U)<br>(mg kg <sup>-1</sup> )                            | Detected<br>(mg kg <sup>-1</sup> ) | Recovery<br>(%) | Certified (±U)<br>(mg kg <sup>-1</sup> )                | Detected<br>(mg kg <sup>-1</sup> ) | Recovery<br>(%) |
| Al      | 92.06±0.89 <sup>a</sup>                                                    | 85.1±4.1                           | 93±5            | 1980±280                                             | 1930±77                            | 98±4            | 252±49                                                | 248±7                              | 98±3            | x                                                                   | 16.5±0.5                           | –               | x                                                       | 1460±45                            |                 |
| As      | 0.0335±0.0089*                                                             | BQL                                | –               | 0.668±0.086                                          | 0.55±0.03                          | 83±4            | 0.138±0.010                                           | 0.17±0.01                          | 120±6           | 0.137±0.067 <sup>b</sup>                                            | BQL                                | –               | 0.651±0.026 <sup>a</sup>                                | 0.71±0.05                          | 109±8           |
| Ca      | x                                                                          | 2400±149                           | –               | 39960±1420                                           | 46400±2830                         | 116±7           | 22970±780                                             | 25000±1650                         | 109±7           | 393±106 <sup>b</sup>                                                | 453±23                             | 115±6           | x                                                       | 1040±53                            |                 |
| Cd      | x                                                                          | 0.057±0.002                        | –               | 2.64±0.14                                            | 2.25±0.05                          | 85±2            | 2.23±0.12                                             | 2.18±0.08                          | 98±4            | 0.0772±0.0192                                                       | 0.062±0.001                        | 80±1            | 1.229±0.11 <sup>a</sup>                                 | 1.12±0.01                          | 91±1            |
| Co      | 0.098±0.012*                                                               | BQL                                | –               | 0.981±0.067                                          | 0.83±0.07                          | 85±7            | 0.154±0.007                                           | 0.13±0.01                          | 82±3            | 0.0133±0.0053 <sup>b*</sup>                                         | BQL                                | –               | x                                                       | 0.194±0.01                         |                 |
| Cr      | 1.590±0.150                                                                | 1.35±0.06                          | 85±3            | 6.3 <sup>c</sup>                                     | 5.28±0.17                          | 84±3            | 0.911 <sup>c</sup>                                    | 0.75±0.04                          | 82±4            | 0.5430±0.2463 <sup>b</sup>                                          | 0.44±0.01                          | 81±1            | 5.79±0.80 <sup>a</sup>                                  | 5.65±0.09                          | 98±2            |
| Cu      | 1.545±0.030 <sup>a</sup>                                                   | 1.69±0.14                          | 109±9           | 10.1±0.4                                             | 10.4±0.5                           | 103±5           | 5.12±0.2                                              | 4.62±0.12                          | 90±2            | 17.4±1.4                                                            | 14.8±0.1                           | 85±1            | 18.73±0.70 <sup>a</sup>                                 | 20.0±0.2                           | 107±1           |
| Fe      | 82.9±5.5                                                                   | 83.2±8.3                           | 100±10          | 1490 <sup>c</sup>                                    | 1420±77                            | 96±5            | 258 <sup>c</sup>                                      | 235±4                              | 91±2            | 31.4±8.1 <sup>b</sup>                                               | 25.5±0.4                           | 81±1            | x                                                       | 1050±16                            |                 |
| Hg      | 0.01323±0.0002*                                                            | BQL                                | –               | 0.0209±0.0013*                                       | BQL                                | –               | 0.0232±0.0016*                                        | BQL                                | –               | 0.0612±0.0040 <sup>b*</sup>                                         | BQL                                | –               | 2.849±0.104 <sup>a</sup>                                | 2.66±0.06                          | 94±2            |
| K       | 1040±130                                                                   | 1210±98                            | 116±9           | 22710±760                                            | 22300±1070                         | 98±5            | 26400±900                                             | 28700±774                          | 109±3           | 43600±2360                                                          | 40300±604                          | 92±1            | x                                                       | 21500±322                          |                 |
| Mg      | 189±11                                                                     | 158±14                             | 84±7            | 8530±340                                             | 8090±461                           | 95±5            | 2410±90                                               | 2410±29                            | 100±1           | 1130±86                                                             | 937±24                             | 83±2            | x                                                       | 536±14                             |                 |
| Mn      | 52.4±1.9                                                                   | 59.0±4.5                           | 113±9           | 180±6                                                | 156±5                              | 87±3            | 136±5                                                 | 136±4                              | 100±3           | 5.3±1.2                                                             | 5.1±0.3                            | 96±5            | x                                                       | 46.5±2.5                           |                 |
| Mo      | x                                                                          | 1.24±0.06                          | –               | 0.414±0.062                                          | 0.34±0.03                          | 89±6            | 0.396±0.029                                           | 0.34±0.03                          | 87±7            | 0.179±0.030 <sup>b</sup>                                            | 0.20±0.01                          | 109±8           | x                                                       | 0.18±0.01                          |                 |
| Na      | 26.0±5.3                                                                   | 23.1±2.1                           | 89±8            | 435 <sup>c</sup>                                     | 378±22                             | 87±5            | 62.4 <sup>c</sup>                                     | 72.0±4.4                           | 115±7           | 577±79                                                              | 538±8                              | 93±1            | x                                                       | 77.5±1.1                           |                 |
| Ni      | x                                                                          | 0.88±0.02                          | –               | 8.5±0.49                                             | 7.38±0.22                          | 87±3            | 1.49±0.14                                             | 1.20±0.02                          | 81±1            | 0.246 <sup>c</sup>                                                  | 0.27±0.01                          | 111±3           | x                                                       | 3.38±0.10                          |                 |
| P       | x                                                                          | 62.5±2.8                           | –               | 1700±120                                             | 1480±53                            | 87±3            | 2420±150                                              | 2470±79                            | 102±3           | 9820±631                                                            | 8970±117                           | 91±             | x                                                       | 3850±50                            |                 |
| Pb      | x                                                                          | 2.44±0.12                          | –               | 2.01±0.31                                            | 2.12±0.10                          | 106±5           | 0.972±0.147                                           | 1.10±0.05                          | 113±5           | 0.188 <sup>c*</sup>                                                 | BQL                                | –               | 1.863±0.108 <sup>a</sup>                                | 1.89±0.05                          | 101±2           |
| Rb      | 3.110±0.099 <sup>a</sup>                                                   | 3.18±0.15                          | 102±5           | 19.1±1.0                                             | 20.9±0.7                           | 109±4           | 5.97±0.28                                             | 7.32±0.31                          | 123±5           | 14.1 <sup>c</sup>                                                   | 12.7±0.6                           | 90±5            | x                                                       | 147±7                              |                 |
| S       | x                                                                          | 1110±53                            | –               | 4550±910                                             | 4200±176                           | 92±4            | 3780±590                                              | 4220±127                           | 112±3           | 2100±161                                                            | 2090±38                            | 100±2           | x                                                       | 13600±244                          |                 |
| Se      | 0.0102±0.0023*                                                             | BQL                                | –               | x                                                    | BQL                                | –               | x                                                     | BQL                                | –               | 0.729 <sup>c</sup>                                                  | 0.69±0.06                          | 94±8            | 17.43±1.36 <sup>a</sup>                                 | 14.5±1.2                           | 83±7            |
| Sr      | x                                                                          | 9.83±0.57                          | –               | 105±5                                                | 121±4                              | 115±4           | 133±6                                                 | 136±8                              | 103±6           | 0.76 <sup>c</sup>                                                   | 0.79±0.05                          | 103±6           | x                                                       | 1.85±0.11                          |                 |
| V       | 0.243±0.011                                                                | 0.23±0.01                          | 95±4            | 4.12±0.55                                            | 3.02±0.13                          | 73±3            | 0.405±0.056                                           | 0.41±0.04                          | 100±10          | 0.07 <sup>c*</sup>                                                  | BQL                                | –               | x                                                       | 2.78±0.13                          |                 |
| Zn      | 9.26±0.9                                                                   | 8.51±0.61                          | 92±5            | 52.4±1.8                                             | 43.5±1.3                           | 83±2            | 43.6±1.4                                              | 41.4±1.9                           | 95±4            | 42.2±4.2                                                            | 33.7±0.5                           | 80±1            | 113.3±3.3 <sup>a</sup>                                  | 97.0±1.5                           | 86±1            |

U – expanded uncertainty of certified value; SD – standard deviation; <sup>a</sup> – reference value; <sup>b</sup> – indicative value; <sup>c</sup> – informative value; BQL—below (method) quantification limit; \* – value below MQ; x – not certified value.

**Table S4.** The comparison of ultrasound–assisted extraction (USN) and conventional brewing (CON) for all procedures (A–D) and yerba mate samples (n=7). All results were given as the relative percentage (%) of extractable contents (USN to CON).

| Procedure | A (tap water, RT)   |                  | B (DI water, RT)    |                  | C (tap water, 80°C) |                  | D (DI water, 80°C)  |                  |
|-----------|---------------------|------------------|---------------------|------------------|---------------------|------------------|---------------------|------------------|
| Elements  | Median<br>(min–max) | AQL<br>(USN–CON) | Median<br>(min–max) | AQL<br>(USN–CON) | Median<br>(min–max) | AQL<br>(USN–CON) | Median<br>(min–max) | AQL<br>(USN–CON) |
| Al        | 118 (99–139)        | 7–7              | 103 (75–164)        | 7–7              | 105 (62–137)        | 7–7              | 140 (105–191)       | 7–7              |
| As        | 127 (78–144)        | 7–6              | 138 (50–218)        | 7–7              | 112 (38–164)        | 7–5              | 149* (129–170)      | 7–2              |
| Ca        | ND                  | ND               | 106 (92–133)        | 7–7              | ND                  | ND               | 143 (107–182)       | 7–7              |
| Cd        | ND                  | 0                | ND (only USN)       | 3–0              | 43 <sup>USN</sup>   | 4–1              | ND (only USN)       | 3–0              |
| Co        | 152 (115–197)       | 6–5              | 106 (95–148)        | 6–6              | 104 (62–158)        | 6–6              | 159 (110–212)       | 6–6              |
| Cr        | 148 (108–174)       | 5–5              | 114 (91–311)        | 5–5              | 125 (64–149)        | 5–5              | 153 (119–236)       | 5–5              |
| Cu        | 116 (79–140)        | 7–7              | 97 (77–152)         | 7–7              | 104 (49–131)        | 7–7              | 154 (115–213)       | 7–7              |
| Fe        | ND                  | 0                | ND (only USN)       | 7–0              | 94 (21–189)         | 7–6              | 199 (107–471)       | 7–6              |
| K         | 116 (76–145)        | 7–7              | 100 (81–164)        | 7–7              | 97 (57–135)         | 7–7              | 150 (109–205)       | 7–7              |
| Mg        | 115 (71–146)        | 7–7              | 97 (87–163)         | 7–7              | 114 (58–142)        | 7–7              | 160 (118–222)       | 7–7              |
| Mn        | 123 (111–149)       | 7–7              | 101 (93–158)        | 7–7              | 120 (64–138)        | 7–7              | 151 (118–213)       | 7–7              |
| Na        | ND                  | ND               | 237 (138–360)       | 7–7              | ND                  | ND               | 99 (66–225)         | 7–7              |
| Ni        | 119 (102–166)       | 7–7              | 117 (108–191)       | 7–6              | 117 (65–147)        | 7–7              | 144 (110–204)       | 7–7              |
| P         | 123 (117–151)       | 7–7              | 98 (87–178)         | 7–7              | 111 (64–143)        | 7–7              | 153 (127–193)       | 7–7              |
| Rb        | 127 (116–158)       | 7–7              | 101 (77–176)        | 7–7              | 99 (52–151)         | 7–7              | 174 (120–246)       | 7–7              |
| S         | ND                  | ND               | 111 (88–233)        | 7–7              | ND                  | ND               | 154 (118–224)       | 7–7              |
| Se        | ND                  | 0                | ND (only USN)       | 1–0              | ND                  | 0                | 99 <sup>USN</sup>   | 3–1              |
| Sr        | 147 <sup>USN</sup>  | 2–1              | 99 (92–143)         | 7–7              | 69 <sup>CON</sup>   | 1–2              | 156 (109–206)       | 7–7              |
| Zn        | 124 (109–163)       | 7–7              | 105 (88–170)        | 7–7              | 115 (62–143)        | 7–7              | 143 (114–195)       | 7–7              |

RT – room temperature; DI – deionized (water); ND – no data; <sup>USN</sup> – single value of the USN/CON ratio with the dominance of USN results; <sup>CON</sup> – single value of the USN/CON ratio with the dominance of CON results; \* – mean of the USN/CON ratios (if n = 2) ,

**Table S5.** The comparison of ultrasound–assisted extraction in boiling water (DI water, 100°C) with procedure D (DI water, 80°C) for selected samples of yerba mate (n=3). All results were given as the relative percentage (%) of extractable content (100°C to 80°C).

| <b>Element</b> | <b>Mean±SD</b> | <b>Median (min–max)</b> |
|----------------|----------------|-------------------------|
| <b>Al</b>      | 126±17         | 132 (103–142)           |
| <b>As</b>      | 163±22         | 157 (140–193)           |
| <b>Ca</b>      | 100±10         | 101 (87–111)            |
| <b>Cd</b>      | 95±14          | 103 (75–106)            |
| <b>Co</b>      | 132±13         | 128 (119–150)           |
| <b>Cr</b>      | 128±18         | 126 (106–151)           |
| <b>Cu</b>      | 140±17         | 144 (117–159)           |
| <b>Fe</b>      | 138±20         | 142 (112–160)           |
| <b>K</b>       | 146±14         | 154 (126–158)           |
| <b>Mg</b>      | 153±18         | 157 (129–173)           |
| <b>Mn</b>      | 135±16         | 138 (113–153)           |
| <b>Na</b>      | 184±72         | 137 (129–286)           |
| <b>Ni</b>      | 135±16         | 140 (114–152)           |
| <b>P</b>       | 136±15         | 138 (117–153)           |
| <b>Rb</b>      | 159±18         | 169 (133–174)           |
| <b>S</b>       | 113±13         | 113 (97–128)            |
| <b>Se</b>      | 132±11         | 125 (124–148)           |
| <b>Sr</b>      | 115±9          | 110 (107–128)           |
| <b>Zn</b>      | 122±20         | 123 (96–146)            |
